# Supplementary material
Source: PubMed Central journal article supplement (PMC6879283)
Supplement: JCM.01287-19-s0001.pdf [file JCM.01287-19-s0001.pdf]

**Supplementary table.** Main clinical and laboratory data of patients included in the study.

| Patient No | Sex | Age | Underlying condition          | Lymphocyte blood count (cells/mm <sup>3</sup> ) | Use of previous systemic glucocorticoid therapy | PJP diagnosis | OW                                    |                      |                     | BAL                              |                                       |                      |                     |
|------------|-----|-----|-------------------------------|-------------------------------------------------|-------------------------------------------------|---------------|---------------------------------------|----------------------|---------------------|----------------------------------|---------------------------------------|----------------------|---------------------|
|            |     |     |                               |                                                 |                                                 |               | Days of PJP treatment before sampling | DHPS PCR result (Ct) | SSU PCR result (Ct) | Days between OW and BAL sampling | Days of PJP treatment before sampling | DHPS PCR result (Ct) | SSU PCR result (Ct) |
| 1          | F   | 65  | Breast cancer                 | 330                                             | Yes                                             | Yes           | -                                     | 36.8                 | 35.3                | 0                                | -                                     | 33.2                 | 28.8                |
| 2          | F   | 60  | Marginal lymphoma             | 2278                                            | No                                              | No            | 2                                     | Negative             | Negative            | 1                                | 1                                     | 37.8                 | 38.3                |
| 3          | M   | 56  | Kidney transplantation        | 1500                                            | Yes                                             | No            | 8                                     | Negative             | Negative            | 2                                | 10                                    | Negative             | Negative            |
| 4          | F   | 58  | HSCT (AML)                    | 300                                             | No                                              | No            | -                                     | Negative             | Negative            | 2                                | 2                                     | Negative             | Negative            |
| 5          | F   | 70  | Lung cancer                   | 203                                             | Yes                                             | Yes           | 1                                     | 37.4                 | 35.2                | 1                                | 2                                     | 35.1                 | 30.6                |
| 6          | F   | 71  | Follicular lymphoma           | 290                                             | No                                              | No            | 3                                     | Negative             | ND                  | 2                                | 5                                     | Negative             | Negative            |
| 7          | F   | 53  | HSCT (MDS)                    | 1400                                            | No                                              | No            | -                                     | 36.5                 | 33.5                | 1                                | -                                     | 35.6                 | 31.1                |
| 8          | M   | 65  | Bladder carcinoma             | 1300                                            | Yes                                             | No            | -                                     | 36.2                 | 30.9                | 0                                | -                                     | 36.8                 | 32.1                |
| 9          | M   | 69  | HSCT (polycythaemia vera)     | 200                                             | No                                              | No            | -                                     | Negative             | Negative            | 2                                | 2                                     | Negative             | Negative            |
| 10         | F   | 69  | ALL                           | 1090                                            | No                                              | No            | -                                     | Negative             | Negative            | 1                                | 1                                     | Negative             | Negative            |
| 11         | M   | 71  | Esophageal adenocarcinoma     | 697                                             | Yes                                             | Yes           | -                                     | 36.9                 | 33.1                | 2                                | 1                                     | 35.5                 | Negative            |
| 12         | M   | 68  | DLCL                          | 1011                                            | Yes                                             | No            | -                                     | 37.6                 | 34.8                | 1                                | -                                     | 37.6                 | 33.3                |
| 13(*)      | M   | 60  | HIV and liver transplantation | 1130                                            | No                                              | Yes           | -                                     | 30.4                 | 26.3                | -                                | -                                     | -                    | -                   |
| 14         | M   | 64  | Liver transplantation         | 800                                             | Yes                                             | No            | 4                                     | Negative             | Negative            | 0                                | 4                                     | Negative             | Negative            |
| 15         | F   | 65  | CLL                           | 800                                             | No                                              | Yes           | -                                     | 36.9                 | 33.9                | 2                                | 1                                     | 38.4                 | 32.1                |

|    |   |    |                        |      |     |     |   |          |          |   |   |          |          |
|----|---|----|------------------------|------|-----|-----|---|----------|----------|---|---|----------|----------|
| 16 | F | 62 | Dermatomyositis        | 900  | Yes | Yes | 1 | 35.7     | 35.7     | 1 | 2 | 33.4     | 29.1     |
| 17 | M | 27 | HSCT (CGD)             | 780  | Yes | No  | 3 | Negative | Negative | 1 | 4 | Negative | Negative |
| 18 | M | 51 | Primary brain lymphoma | 323  | No  | Yes | 1 | 35.1     | 31.7     | 0 | 1 | 33.1     | 30.2     |
| 19 | M | 54 | Follicular lymphoma    | 289  | Yes | No  | - | Negative | Negative | 0 | - | Negative | Negative |
| 20 | F | 79 | DLCL                   | 331  | No  | No  | - | Negative | Negative | 1 | - | Negative | Negative |
| 21 | M | 51 | Astrocytoma            | 1098 | Yes | No  | 1 | Negative | Negative | 0 | 1 | 38.0     | 30.9     |
| 22 | M | 68 | Pancreas cancer        | 478  | No  | Yes | - | 34.9     | 32.1     | 1 | 1 | 35.7     | 32.0     |
| 23 | F | 55 | Follicular lymphoma    | 1039 | No  | Yes | - | 38.1     | 35.2     | 1 | 1 | 34.2     | 30.1     |
| 24 | F | 51 | HSCT (ALL)             | 2808 | Yes | No  | - | Negative | Negative | 2 | 2 | Negative | Negative |
| 25 | F | 75 | Choroid melanoma       | 942  | No  | No  | - | Negative | Negative | 0 | - | 37.0     | 33.9     |
| 26 | F | 53 | Lung cancer            | 700  | No  | No  | 2 | Negative | Negative | 2 | 4 | Negative | Negative |
| 27 | F | 59 | Breast cancer          | 500  | Yes | Yes | - | 33.1     | 29.5     | 2 | 2 | 32.7     | 28.4     |
| 28 | M | 63 | Lung cancer            | 1100 | Yes | No  | - | Negative | Negative | 2 | 2 | Negative | 33.9     |
| 29 | F | 58 | Breast cancer          | 584  | Yes | Yes | - | 36.2     | 36.0     | 1 | 1 | 35.8     | 30.5     |
| 30 | M | 71 | DLCL                   | 200  | Yes | No  | - | Negative | Negative | 1 | 1 | 37.3     | 33.6     |
| 31 | M | 78 | Liver transplantation  | 664  | No  | Yes | - | 36.6     | 29.7     | 1 | 1 | 33.8     | ND       |
| 32 | M | 40 | HIV                    | 1113 | No  | Yes | 1 | 26.6     | 22.7     | 0 | 1 | 24.0     | 23.0     |
| 33 | F | 44 | HIV                    | 1600 | No  | No  | - | Negative | Negative | 2 | 1 | Negative | Negative |
| 34 | M | 42 | HIV                    | 900  | No  | Yes | - | 35.1     | 29.8     | 1 | 1 | 31.5     | 25.1     |
| 35 | M | 56 | HIV                    | 1120 | No  | Yes | - | 34.7     | 28.3     | 1 | 1 | 23.1     | 18.7     |
| 36 | M | 49 | HIV                    | 2000 | No  | No  | - | Negative | Negative | 0 | 1 | Negative | Negative |

(\*) BAL specimen was not available but PJP was diagnosed on cytological analysis of lung biopsy.

M: male, F: female, HSCT: hematopoietic stem cell transplantation; AML: acute myeloid leukemia, MDS: myelodysplastic syndrome, ALL: acute lymphoblastic leukemia, DLCL: diffuse large B-Cell lymphoma, HIV: human immunodeficiency virus, CLL: chronic lymphocytic leukemia, CGD: chronic granulomatous disease, ND: not determined.
